# Supplementary material
Source: Springer Nature journal article supplement (https://www.springermedizin.de/resource/supplementary/12881_2009_609_MOESM10_ESM.pdf/9451060)

# Family 7 (258)

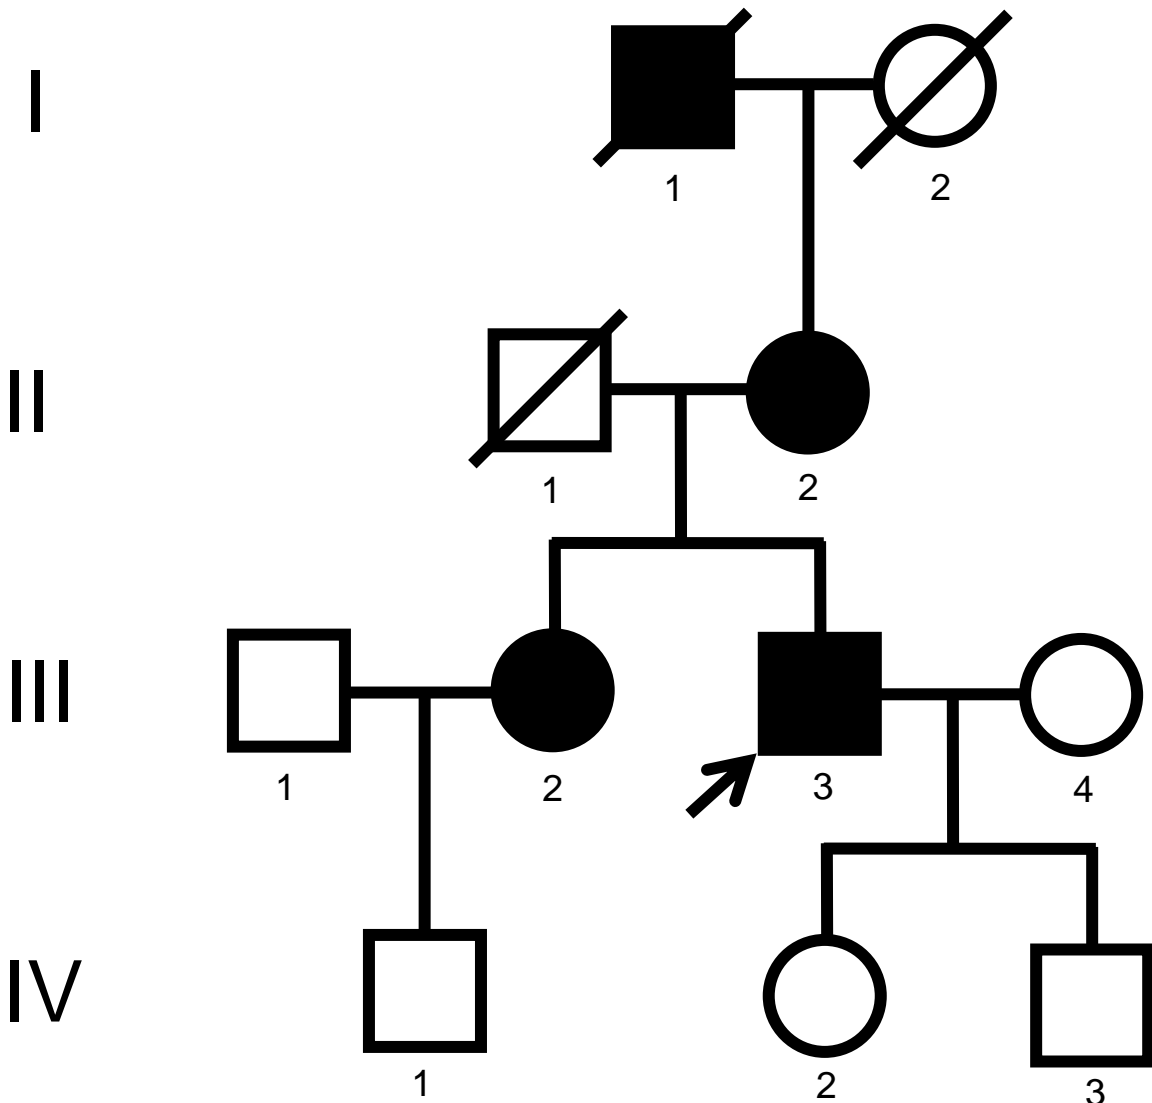

Supplement: MOESM10 [file 9451060]
